# Supplementary material
Source: MDPI journal article supplement (https://www.mdpi.com/2073-445X/12/4/737)
Supplement: s1 [file s1]

## Large-Scale Land Acquisition and Household Farm Investment in Northern Ghana

### Supplementary information

**Table S1: Determinants and extra effects of direct exposure to LSLA by foreign entities in the presence of other factors influencing levels of investments**

| VARIABLES                                | (1)<br>orderedLIT     | (2)<br>Direct Foreign | (3)<br>/orderedLIT    | (4)<br>/              |
|------------------------------------------|-----------------------|-----------------------|-----------------------|-----------------------|
| 1.Gender#0b.Direct_Foreign               | 0.7820***<br>(0.1520) |                       | 0.782***<br>(0.152)   | 0.782***<br>(0.152)   |
| 1.Gender#1.Direct_Foreign                | 0.1071*<br>(0.0600)   |                       | 0.1071*<br>(0.060)    | 0.1071*<br>(0.060)    |
| 0b.Direct_Foreign#c.Age_HHH              | 0.00363<br>(0.00345)  |                       | 0.00363<br>(0.00345)  | 0.00363<br>(0.00345)  |
| 1.Direct_Foreign#c.Age_HHH               | 0.00132<br>(0.00738)  |                       | 0.00132<br>(0.00738)  | 0.00132<br>(0.00738)  |
| 0b.Direct_Foreign#c.HHsize               | -0.00292<br>(0.00586) |                       | -0.00292<br>(0.00586) | -0.00292<br>(0.00586) |
| 1.Direct_Foreign#c.HHsize                | -0.00773<br>(0.0139)  |                       | -0.00773<br>(0.0139)  | -0.00773<br>(0.0139)  |
| 0b.Direct_Foreign#c.Education            | 0.1440***<br>(0.0316) |                       | 0.1440***<br>(0.0316) | 0.1440***<br>(0.0316) |
| 1.Direct_Foreign#c.Education             | 0.00351<br>(0.0237)   |                       | 0.00351<br>(0.0237)   | 0.00351<br>(0.0237)   |
| 1.Know_anybodylossland#0b.Direct_Foreign | -0.0176<br>(0.103)    |                       | -0.0176<br>(0.103)    | -0.0176<br>(0.103)    |
| 1.Know_anybodylossland#1.Direct_Foreign  | 0.275<br>(0.215)      |                       | 0.275<br>(0.215)      | 0.275<br>(0.215)      |
| 1.Social_group#0b.Direct_Foreign         | -0.197**<br>(0.0986)  |                       | -0.197**<br>(0.0986)  | -0.197**<br>(0.0986)  |
| 1.Social_group#1.Direct_Foreign          | 0.215                 |                       | 0.215                 | 0.215                 |

|                                       |            |            |            |
|---------------------------------------|------------|------------|------------|
|                                       | (0.173)    | (0.173)    | (0.173)    |
| 1.Access_good_roads#0b.Direct_Foreign | -0.165*    | -0.165*    | -0.165*    |
|                                       | (0.0986)   | (0.0986)   | (0.0986)   |
| 1.Access_good_roads#1.Direct_Foreign  | 0.372*     | 0.372*     | 0.372*     |
|                                       | (0.202)    | (0.202)    | (0.202)    |
| 1.Credit_access#0b.Direct_Foreign     | 0.0849     | 0.0849     | 0.0849     |
|                                       | (0.0927)   | (0.0927)   | (0.0927)   |
| 1.Credit_access#1.Direct_Foreign      | -0.0353    | -0.0353    | -0.0353    |
|                                       | (0.182)    | (0.182)    | (0.182)    |
| 1.Good_fertile#0b.Direct_Foreign      | -0.2601*** | -0.2601*** | -0.2601*** |
|                                       | (0.0962)   | (0.0962)   | (0.0962)   |
| 1.Good_fertile#1.Direct_Foreign       | -0.325*    | -0.325*    | -0.325*    |
|                                       | (0.190)    | (0.190)    | (0.190)    |
| 1.Moderate_fertile#0b.Direct_Foreign  | -0.230*    | -0.230*    | -0.230*    |
|                                       | (0.132)    | (0.132)    | (0.132)    |
| 1.Moderate_fertile#1.Direct_Foreign   | 0.267      | 0.267      | 0.267      |
|                                       | (0.279)    | (0.279)    | (0.279)    |
| 1.Fert_subsidy#0b.Direct_Foreign      | -0.0243    | -0.0243    | -0.0243    |
|                                       | (0.0980)   | (0.0980)   | (0.0980)   |
| 1.Fert_subsidy#1.Direct_Foreign       | 0.224      | 0.224      | 0.224      |
|                                       | (0.227)    | (0.227)    | (0.227)    |
| 1.Sagnarigu#0b.Direct_Foreign         | -0.501**   | -0.501**   | -0.501**   |
|                                       | (0.248)    | (0.248)    | (0.248)    |
| 1.Sagnarigu#1.Direct_Foreign          | -0.291     | -0.291     | -0.291     |
|                                       | (0.397)    | (0.397)    | (0.397)    |
| 1.Mion#0b.Direct_Foreign              | -0.219*    | -0.219*    | -0.219*    |
|                                       | (0.120)    | (0.120)    | (0.120)    |
| 1.Mion#1.Direct_Foreign               | -0.468***  | -0.468***  | -0.468***  |
|                                       | (0.160)    | (0.160)    | (0.160)    |
| 1.Centralgonja#0b.Direct_Foreign      | -0.227*    | -0.227*    | -0.227*    |
|                                       | (0.130)    | (0.130)    | (0.130)    |
| 1.Centralgonja#1.Direct_Foreign       | 0.386***   | 0.386***   | 0.386***   |
|                                       | (0.134)    | (0.134)    | (0.134)    |

|                                 |                     |                       |                     |                     |
|---------------------------------|---------------------|-----------------------|---------------------|---------------------|
| 1.Savalegu#0b.Direct_Foreign    | -0.305**<br>(0.140) |                       | -0.305**<br>(0.140) | -0.305**<br>(0.140) |
| 1.Savalegu#1.Direct_Foreign     | -0.192<br>(0.342)   |                       | -0.192<br>(0.342)   | -0.192<br>(0.342)   |
| 1.Yagbakubori#0b.Direct_Foreign | -0.288<br>(0.248)   |                       | -0.288<br>(0.248)   | -0.288<br>(0.248)   |
| 1.Yagbakubori#1.Direct_Foreign  | -0.319*<br>(0.189)  |                       | -0.319*<br>(0.189)  | -0.319*<br>(0.189)  |
| Gender                          |                     | 0.801***<br>(0.228)   |                     |                     |
| Age_HHH                         |                     | 0.00261<br>(0.00473)  |                     |                     |
| HHsize                          |                     | -0.00317<br>(0.00842) |                     |                     |
| Education                       |                     | 0.1770***<br>(0.0410) |                     |                     |
| Know_anybodylossland            |                     | -0.0407<br>(0.131)    |                     |                     |
| Social_group                    |                     | -0.187<br>(0.131)     |                     |                     |
| Access_good_roads               |                     | -0.176***<br>(0.030)  |                     |                     |
| Credit_access                   |                     | -0.0312<br>(0.123)    |                     |                     |
| Good_fertile                    |                     | 0.0105<br>(0.126)     |                     |                     |
| Moderate_fertile                |                     | -0.246<br>(0.165)     |                     |                     |
| Perception_tenure_security      |                     | -0.543***<br>(0.149)  |                     |                     |
| Fert_subsidy                    |                     | -0.277**<br>(0.135)   |                     |                     |
| Sagnarigu                       |                     | 0.706***              |                     |                     |

|                           |     |           |     |     |
|---------------------------|-----|-----------|-----|-----|
| Mion                      |     | (0.136)   |     |     |
|                           |     | 0.560***  |     |     |
| Centralgonja              |     | (0.155)   |     |     |
|                           |     | 0.379     |     |     |
| Savalegu                  |     | (0.536)   |     |     |
|                           |     | 0.770     |     |     |
| Yagbakubori               |     | (0.526)   |     |     |
|                           |     | 0.383     |     |     |
| Access_formal_landinstite |     | (0.537)   |     |     |
|                           |     | -1.304*** |     |     |
| Constant                  |     | (0.211)   |     |     |
|                           |     | -1.207*   |     |     |
|                           |     | (0.641)   |     |     |
| Observations              | 661 | 661       | 661 | 661 |

Robust standard errors in parentheses

\*\*\* p<0.01, \*\* p<0.05, \* p<0.1

**Table S2: Determinants and extra effects of indirect exposure to LSLA by foreign entities in the presence of other factors influencing levels of investments**

| VARIABLES                     | (1)<br>oderedLIT        | (2)<br>Indirect_Foreign | (3)<br>/oderedLIT       | (4)<br>/                |
|-------------------------------|-------------------------|-------------------------|-------------------------|-------------------------|
| 1.Gender#0b.Indirect_Foreign  | -0.8821***<br>(0.203)   |                         | -0.8821***<br>(0.203)   | -0.8821***<br>(0.203)   |
| 1.Gender#1.Indirect_Foreign   | -0.324***<br>(0.064)    |                         | -0.324***<br>(0.064)    | -0.324***<br>(0.064)    |
| 0b.Indirect_Foreign#c.Age_HHH | 0.12031*<br>(0.07101)   |                         | 0.12031*<br>(0.07101)   | 0.12031*<br>(0.07101)   |
| 1.Indirect_Foreign#c.Age_HHH  | 0.49511***<br>(0.11421) |                         | 0.49511***<br>(0.11421) | 0.49511***<br>(0.11421) |
| 0b.Indirect_Foreign#c.HHsize  | -0.00129<br>(0.00579)   |                         | -0.00129<br>(0.00579)   | -0.00129<br>(0.00579)   |
| 1.Indirect_Foreign#c.HHsize   | 0.00284<br>(0.0142)     |                         | 0.00284<br>(0.0142)     | 0.00284<br>(0.0142)     |

|                                                  |                       |                       |                       |
|--------------------------------------------------|-----------------------|-----------------------|-----------------------|
| 0b.Indirect_Foreign#c.Education                  | 0.1311**<br>(0.0611)  | 0.1311**<br>(0.0611)  | 0.1311**<br>(0.0611)  |
| 1.Indirect_Foreign#c.Education                   | 0.0112<br>(0.0233)    | 0.0112<br>(0.0233)    | 0.0112<br>(0.0233)    |
| 1.Know_anybodylossland#0b.Indirect_Foreign       | 0.0907<br>(0.0990)    | 0.0907<br>(0.0990)    | 0.0907<br>(0.0990)    |
| 1.Know_anybodylossland#1.Indirect_Foreign        | -0.322***<br>(0.119)  | -0.322***<br>(0.119)  | -0.322***<br>(0.119)  |
| 1.Social_group#0b.Indirect_Foreign               | -0.113***<br>(0.0163) | -0.113***<br>(0.0163) | -0.113***<br>(0.0163) |
| 1.Social_group#1.Indirect_Foreign                | -0.204**<br>(0.094)   | -0.204**<br>(0.094)   | -0.204**<br>(0.094)   |
| 1.Access_good_roads#0b.Indirect_Foreign          | -0.0465<br>(0.0969)   | -0.0465<br>(0.0969)   | -0.0465<br>(0.0969)   |
| 1.Access_good_roads#1.Indirect_Foreign           | -0.411*<br>(0.236)    | -0.411*<br>(0.236)    | -0.411*<br>(0.236)    |
| 1.Credit_access#0b.Indirect_Foreign              | 0.106<br>(0.0949)     | 0.106<br>(0.0949)     | 0.106<br>(0.0949)     |
| 1.Credit_access#1.Indirect_Foreign               | 0.0459<br>(0.206)     | 0.0459<br>(0.206)     | 0.0459<br>(0.206)     |
| 1.Good_fertile#0b.Indirect_Foreign               | -0.0109<br>(0.0985)   | -0.0109<br>(0.0985)   | -0.0109<br>(0.0985)   |
| 1.Good_fertile#1.Indirect_Foreign                | 0.118<br>(0.215)      | 0.118<br>(0.215)      | 0.118<br>(0.215)      |
| 1.Moderate_fertile#0b.Indirect_Foreign           | -0.0723<br>(0.130)    | -0.0723<br>(0.130)    | -0.0723<br>(0.130)    |
| 1.Moderate_fertile#1.Indirect_Foreign            | 0.251<br>(0.275)      | 0.251<br>(0.275)      | 0.251<br>(0.275)      |
| 1.Perception_tenure_security#0b.Indirect_Foreign | -0.0673<br>(0.113)    | -0.0673<br>(0.113)    | -0.0673<br>(0.113)    |
| 1.Perception_tenure_security#1.Indirect_Foreign  | -0.165<br>(0.293)     | -0.165<br>(0.293)     | -0.165<br>(0.293)     |
| 1.Fert_subsidy#0b.Indirect_Foreign               | 0.0293                | 0.0293                | 0.0293                |

|                                    |           |           |           |           |
|------------------------------------|-----------|-----------|-----------|-----------|
|                                    | (0.0991)  |           | (0.0991)  | (0.0991)  |
| 1.Fert_subsidy#1.Indirect_Foreign  | 0.129     |           | 0.129     | 0.129     |
|                                    | (0.167)   |           | (0.167)   | (0.167)   |
| 1.Sagnarigu#0b.Indirect_Foreign    | -0.829*** |           | -0.829*** | -0.829*** |
|                                    | (0.276)   |           | (0.276)   | (0.276)   |
| 1.Sagnarigu#1.Indirect_Foreign     | -0.210    |           | -0.210    | -0.210    |
|                                    | (0.448)   |           | (0.448)   | (0.448)   |
| 1.Mion#0b.Indirect_Foreign         | -0.640**  |           | -0.640**  | -0.640**  |
|                                    | (0.299)   |           | (0.299)   | (0.299)   |
| 1.Mion#1.Indirect_Foreign          | 0.531     |           | 0.531     | 0.531     |
|                                    | (0.537)   |           | (0.537)   | (0.537)   |
| 1.Centralgonja#0b.Indirect_Foreign | -0.429    |           | -0.429    | -0.429    |
|                                    | (0.286)   |           | (0.286)   | (0.286)   |
| 1.Centralgonja#1.Indirect_Foreign  | 0.261     |           | 0.261     | 0.261     |
|                                    | (0.399)   |           | (0.399)   | (0.399)   |
| 1.Savalegu#0b.Indirect_Foreign     | -0.653**  |           | -0.653**  | -0.653**  |
|                                    | (0.267)   |           | (0.267)   | (0.267)   |
| 1.Savalegu#1.Indirect_Foreign      | 0.177     |           | 0.177     | 0.177     |
|                                    | (0.409)   |           | (0.409)   | (0.409)   |
| 1.Yagbakubori#0b.Indirect_Foreign  | -0.601**  |           | -0.601**  | -0.601**  |
|                                    | (0.278)   |           | (0.278)   | (0.278)   |
| 1.Yagbakubori#1.Indirect_Foreign   | 0.203     |           | 0.203     | 0.203     |
|                                    | (0.528)   |           | (0.528)   | (0.528)   |
| Gender                             |           | -1.057*** |           |           |
|                                    |           | (0.170)   |           |           |
| Age_HHH                            |           | -0.00227  |           |           |
|                                    |           | (0.00449) |           |           |
| HHsize                             |           | -0.10525* |           |           |
|                                    |           | (0.0611)  |           |           |
| Education                          |           | 0.181***  |           |           |
|                                    |           | (0.0424)  |           |           |
| Know_anybodylossland               |           | -0.0443   |           |           |
|                                    |           | (0.135)   |           |           |

|                             |     |           |     |     |
|-----------------------------|-----|-----------|-----|-----|
| Social_group                |     | -0.376*** |     |     |
|                             |     | (0.132)   |     |     |
| Access_good_roads           |     | -0.367*** |     |     |
|                             |     | (0.139)   |     |     |
| Credit_access               |     | 0.365***  |     |     |
|                             |     | (0.125)   |     |     |
| Good_fertile                |     | 0.370***  |     |     |
|                             |     | (0.132)   |     |     |
| Moderate_fertile            |     | 0.394**   |     |     |
|                             |     | (0.195)   |     |     |
| Perception_tenure_security  |     | -0.00897  |     |     |
|                             |     | (0.165)   |     |     |
| Fert_subsidy                |     | 0.0297    |     |     |
|                             |     | (0.138)   |     |     |
| Sagnarigu                   |     | -0.726**  |     |     |
|                             |     | (0.355)   |     |     |
| Mion                        |     | -0.403    |     |     |
|                             |     | (0.370)   |     |     |
| Centralgonja                |     | -0.333    |     |     |
|                             |     | (0.345)   |     |     |
| Savalegu                    |     | -0.581*   |     |     |
|                             |     | (0.332)   |     |     |
| Yagbakubori                 |     | -0.656*   |     |     |
|                             |     | (0.349)   |     |     |
| Access_formal_landinstitute |     | -1.110*** |     |     |
|                             |     | (0.212)   |     |     |
| Constant                    |     | 0.384     |     |     |
|                             |     | (0.495)   |     |     |
| Observations                | 661 | 661       | 661 | 661 |

Robust standard errors in parentheses

\*\*\* p<0.01, \*\* p<0.05, \* p<0.1

**Table S3: Determinants and extra effects of direct exposure to LSLA by domestic entities in the presence of other factors influencing levels of investments**

| VARIABLES                                 | oderedLIT               | Direct Domestic | /oderedLIT              | /                       |
|-------------------------------------------|-------------------------|-----------------|-------------------------|-------------------------|
| 1.Gender#0b.Direct_Domestic               | 0.0884<br>(0.146)       |                 | 0.0884<br>(0.146)       | 0.0884<br>(0.146)       |
| 1.Gender#1.Direct_Domestic                | 0.118**<br>(0.051)      |                 | 0.118**<br>(0.051)      | 0.118**<br>(0.051)      |
| 0b.Direct_Domestic#c.Age_HHH              | 0.27611***<br>(0.10034) |                 | 0.27611***<br>(0.10034) | 0.27611***<br>(0.10034) |
| 1.Direct_Domestic#c.Age_HHH               | 0.10481*<br>(0.06141)   |                 | 0.10481*<br>(0.06141)   | 0.10481*<br>(0.06141)   |
| 0b.Direct_Domestic#c.HHsize               | -0.00727<br>(0.00589)   |                 | -0.00727<br>(0.00589)   | -0.00727<br>(0.00589)   |
| 1.Direct_Domestic#c.HHsize                | 0.00252<br>(0.0104)     |                 | 0.00252<br>(0.0104)     | 0.00252<br>(0.0104)     |
| 0b.Direct_Domestic#c.Education            | 0.000194<br>(0.0113)    |                 | 0.000194<br>(0.0113)    | 0.000194<br>(0.0113)    |
| 1.Direct_Domestic#c.Education             | 0.0184<br>(0.0203)      |                 | 0.0184<br>(0.0203)      | 0.0184<br>(0.0203)      |
| 1.Know_anybodylossland#0b.Direct_Domestic | -0.127***<br>(0.0412)   |                 | -0.127***<br>(0.0412)   | -0.127***<br>(0.0412)   |
| 1.Know_anybodylossland#1.Direct_Domestic  | 0.111***<br>(0.0519)    |                 | 0.111***<br>(0.0519)    | 0.111***<br>(0.0519)    |
| 1.Social_group#0b.Direct_Domestic         | -0.655***<br>(0.1910)   |                 | -0.655***<br>(0.1910)   | -0.655***<br>(0.1910)   |
| 1.Social_group#1.Direct_Domestic          | -0.899***<br>(0.175)    |                 | -0.899***<br>(0.175)    | -0.899***<br>(0.175)    |
| 1.Access_good_roads#0b.Direct_Domestic    | 0.0571<br>(0.0946)      |                 | 0.0571<br>(0.0946)      | 0.0571<br>(0.0946)      |
| 1.Access_good_roads#1.Direct_Domestic     | 0.178<br>(0.159)        |                 | 0.178<br>(0.159)        | 0.178<br>(0.159)        |
| 1.Credit_access#0b.Direct_Domestic        | -0.0536                 |                 | -0.0536                 | -0.0536                 |



|                                       |          |          |          |
|---------------------------------------|----------|----------|----------|
|                                       | (0.0863) | (0.0863) | (0.0863) |
| 1.Credit_access#1.Direct_Domestic     | 0.308    | 0.308    | 0.308    |
|                                       | (0.219)  | (0.219)  | (0.219)  |
| 1.Good_fertile#0b.Direct_Domestic     | -0.0908  | -0.0908  | -0.0908  |
|                                       | (0.0946) | (0.0946) | (0.0946) |
| 1.Good_fertile#1.Direct_Domestic      | -0.343** | -0.343** | -0.343** |
|                                       | (0.169)  | (0.169)  | (0.169)  |
| 1.Moderate_fertile#0b.Direct_Domestic | 0.0532   | 0.0532   | 0.0532   |
|                                       | (0.120)  | (0.120)  | (0.120)  |
| 1.Moderate_fertile#1.Direct_Domestic  | -0.733** | -0.733** | -0.733** |
|                                       | (0.324)  | (0.324)  | (0.324)  |
| 1.Fert_subsidy#0b.Direct_Domestic     | 0.150    | 0.150    | 0.150    |
|                                       | (0.0941) | (0.0941) | (0.0941) |
| 1.Fert_subsidy#1.Direct_Domestic      | 0.0770   | 0.0770   | 0.0770   |
|                                       | (0.167)  | (0.167)  | (0.167)  |
| 1.Sagnarigu#0b.Direct_Domestic        | -0.530** | -0.530** | -0.530** |
|                                       | (0.242)  | (0.242)  | (0.242)  |
| 1.Sagnarigu#1.Direct_Domestic         | -0.427   | -0.427   | -0.427   |
|                                       | (0.421)  | (0.421)  | (0.421)  |
| 1.Mion#0b.Direct_Domestic             | -0.325   | -0.325   | -0.325   |
|                                       | (0.266)  | (0.266)  | (0.266)  |
| 1.Mion#1.Direct_Domestic              | -0.762*  | -0.762*  | -0.762*  |
|                                       | (0.437)  | (0.437)  | (0.437)  |
| 1.Centralgonja#0b.Direct_Domestic     | -0.246   | -0.246   | -0.246   |
|                                       | (0.237)  | (0.237)  | (0.237)  |
| 1.Centralgonja#1.Direct_Domestic      | -0.489   | -0.489   | -0.489   |
|                                       | (0.420)  | (0.420)  | (0.420)  |
| 1.Savalegu#0b.Direct_Domestic         | -0.311   | -0.311   | -0.311   |
|                                       | (0.229)  | (0.229)  | (0.229)  |
| 1.Savalegu#1.Direct_Domestic          | -0.294   | -0.294   | -0.294   |
|                                       | (0.387)  | (0.387)  | (0.387)  |
| 1.Yagbakubori#0b.Direct_Domestic      | -0.143   | -0.143   | -0.143   |
|                                       | (0.247)  | (0.247)  | (0.247)  |

|                                 |                   |                       |                   |                   |
|---------------------------------|-------------------|-----------------------|-------------------|-------------------|
| 1.Yagbakubori#1.Direct_Domestic | -0.336<br>(0.378) |                       | -0.336<br>(0.378) | -0.336<br>(0.378) |
| Gender                          |                   | 0.386*<br>(0.214)     |                   |                   |
| Age_HHH                         |                   | -0.00199<br>(0.00454) |                   |                   |
| HHsize                          |                   | -0.00807<br>(0.00925) |                   |                   |
| Education                       |                   | -0.0189<br>(0.0148)   |                   |                   |
| Know_anybodylossland            |                   | -0.180<br>(0.122)     |                   |                   |
| Social_group                    |                   | 0.341***<br>(0.118)   |                   |                   |
| Access_good_roads               |                   | 0.265**<br>(0.119)    |                   |                   |
| Credit_access                   |                   | -0.0546<br>(0.109)    |                   |                   |
| Good_fertile                    |                   | 0.459***<br>(0.121)   |                   |                   |
| Moderate_fertile                |                   | 0.0253<br>(0.164)     |                   |                   |
| Perception_tenure_security      |                   | 0.326**<br>(0.162)    |                   |                   |
| Fert_subsidy                    |                   | 0.267**<br>(0.124)    |                   |                   |
| Sagnarigu                       |                   | -0.299<br>(0.365)     |                   |                   |
| Mion                            |                   | -0.377<br>(0.373)     |                   |                   |
| Centralgonja                    |                   | -0.584*<br>(0.343)    |                   |                   |
| Savalegu                        |                   | -0.289                |                   |                   |

|                           |     |           |     |     |
|---------------------------|-----|-----------|-----|-----|
| Yagbakubori               |     | (0.327)   |     |     |
|                           |     | 0.00964   |     |     |
| Access_formal_landinstite |     | (0.341)   |     |     |
|                           |     | -1.015*** |     |     |
|                           |     | (0.235)   |     |     |
| Constant                  |     | -0.831    |     |     |
|                           |     | (0.507)   |     |     |
| Observations              | 661 | 661       | 661 | 661 |

Robust standard errors in parentheses

\*\*\* p<0.01, \*\* p<0.05, \* p<0.1

**Table S4: Determinants and extra effects of indirect exposure to LSLA by domestic entities in the presence of other factors influencing levels of investments**

| VARIABLES                        | (1)<br>oderedLIT     | (2)<br>Indirect_Domestic | (3)<br>/oderedLIT    | (4)<br>/ |
|----------------------------------|----------------------|--------------------------|----------------------|----------|
| 1.Gender#0b.Indirect_Domestic    | 0.00487<br>(0.161)   |                          | 0.00487<br>(0.161)   |          |
| 1.Gender#1.Indirect_Domestic     | 0.522*<br>(0.297)    |                          | 0.522*<br>(0.297)    |          |
| 0b.Indirect_Domestic#c.Age_HHH   | 0.00252<br>(0.00364) |                          | 0.00252<br>(0.00364) |          |
| 1.Indirect_Domestic#c.Age_HHH    | 0.00582<br>(0.00703) |                          | 0.00582<br>(0.00703) |          |
| 0b.Indirect_Domestic#c.HHsize    | 0.00199<br>(0.00599) |                          | 0.00199<br>(0.00599) |          |
| 1.Indirect_Domestic#c.HHsize     | -0.0147<br>(0.0113)  |                          | -0.0147<br>(0.0113)  |          |
| 0b.Indirect_Domestic#c.Education | 0.00653<br>(0.0109)  |                          | 0.00653<br>(0.0109)  |          |
| 1.Indirect_Domestic#c.Education  | 0.00425<br>(0.0255)  |                          | 0.00425<br>(0.0255)  |          |

|                                             |                       |                       |
|---------------------------------------------|-----------------------|-----------------------|
| 1.Know_anybodylossland#0b.Indirect_Domestic | 0.0864<br>(0.0986)    | 0.0864<br>(0.0986)    |
| 1.Know_anybodylossland#1.Indirect_Domestic  | -0.230<br>(0.211)     | -0.230<br>(0.211)     |
| 1.Social_group#0b.Indirect_Domestic         | -0.399*<br>(0.2163)   | -0.399*<br>(0.2163)   |
| 1.Social_group#1.Indirect_Domestic          | -0.361*<br>(0.213)    | -0.361*<br>(0.213)    |
| 1.Access_good_roads#0b.Indirect_Domestic    | 0.0802<br>(0.0953)    | 0.0802<br>(0.0953)    |
| 1.Access_good_roads#1.Indirect_Domestic     | -0.193<br>(0.198)     | -0.193<br>(0.198)     |
| 1.Credit_access#0b.Indirect_Domestic        | 0.0729<br>(0.0929)    | 0.0729<br>(0.0929)    |
| 1.Credit_access#1.Indirect_Domestic         | -0.312*<br>(0.188)    | -0.312*<br>(0.188)    |
| 1.Good_fertile#0b.Indirect_Domestic         | -0.626***<br>(0.1940) | -0.626***<br>(0.1940) |
| 1.Good_fertile#1.Indirect_Domestic          | -0.572***<br>(0.201)  | -0.572***<br>(0.201)  |
| 1.Moderate_fertile#0b.Indirect_Domestic     | -0.558***<br>(0.124)  | -0.558***<br>(0.124)  |
| 1.Moderate_fertile#1.Indirect_Domestic      | -0.751***<br>(0.230)  | -0.751***<br>(0.230)  |
| 1.Fert_subsidy#0b.Indirect_Domestic         | 0.596***<br>(0.1968)  | 0.596***<br>(0.1968)  |
| 1.Fert_subsidy#1.Indirect_Domestic          | -0.327*<br>(0.188)    | -0.327*<br>(0.188)    |
| 1.Sagnarigu#0b.Indirect_Domestic            | -0.266<br>(0.299)     | -0.266<br>(0.299)     |
| 1.Sagnarigu#1.Indirect_Domestic             | -0.498<br>(0.431)     | -0.498<br>(0.431)     |
| 1.Mion#0b.Indirect_Domestic                 | 0.778**               | 0.778**               |

|                                     |                      |                      |
|-------------------------------------|----------------------|----------------------|
| 1.Mion#1.Indirect_Domestic          | (0.319)<br>-0.660*** | (0.319)<br>-0.660*** |
| 1.Centralgonja#0b.Indirect_Domestic | (0.126)<br>0.00834   | (0.126)<br>0.00834   |
| 1.Centralgonja#1.Indirect_Domestic  | (0.324)<br>-0.217    | (0.324)<br>-0.217    |
| 1.Savalegu#0b.Indirect_Domestic     | (0.431)<br>-0.422*   | (0.431)<br>-0.422*   |
| 1.Savalegu#1.Indirect_Domestic      | (0.217)<br>-0.434*** | (0.217)<br>-0.434*** |
| 1.Yagbakubori#0b.Indirect_Domestic  | (0.124)<br>-0.0742   | (0.124)<br>-0.0742   |
| 1.Yagbakubori#1.Indirect_Domestic   | (0.302)<br>-0.210    | (0.302)<br>-0.210    |
|                                     | (0.435)              | (0.435)              |
| Gender                              |                      | 0.335                |
|                                     |                      | (0.224)              |
| Age_HHH                             |                      | 0.15711***           |
|                                     |                      | (0.04911)            |
| HHsize                              |                      | 0.00758              |
|                                     |                      | (0.00831)            |
| Education                           |                      | -0.0197              |
|                                     |                      | (0.0160)             |
| Know_anybodylossland                |                      | 0.104***             |
|                                     |                      | (0.033)              |
| Social_group                        |                      | 0.814***             |
|                                     |                      | (0.132)              |
| Access_good_roads                   |                      | 0.177                |
|                                     |                      | (0.127)              |
| Credit_access                       |                      | -0.241**             |
|                                     |                      | (0.122)              |
| Good_fertile                        |                      | -0.0749              |
|                                     |                      | (0.127)              |

|                                       |     |           |          |     |
|---------------------------------------|-----|-----------|----------|-----|
| Moderate_fertile                      |     | -0.0819   |          |     |
|                                       |     | (0.167)   |          |     |
| Perception_tenure_security            |     | -0.166    |          |     |
|                                       |     | (0.163)   |          |     |
| Fert_subsidy                          |     | -0.0726   |          |     |
|                                       |     | (0.131)   |          |     |
| Sagnarigu                             |     | 0.550***  |          |     |
|                                       |     | (0.122)   |          |     |
| Mion                                  |     | 0.746***  |          |     |
|                                       |     | (0.137)   |          |     |
| Centralgonja                          |     | 1.016*    |          |     |
|                                       |     | (0.520)   |          |     |
| Savalegu                              |     | 0.581     |          |     |
|                                       |     | (0.509)   |          |     |
| Yagbakubori                           |     | 0.542     |          |     |
|                                       |     | (0.527)   |          |     |
| Access_formal_landinstite             |     | -1.410*** |          |     |
|                                       |     | (0.240)   |          |     |
| corr(e.Indirect_Domestic,e.oderedLIT) |     |           | 0.533*** |     |
|                                       |     |           | (0.184)  |     |
| Constant                              |     | -1.668*** |          |     |
|                                       |     | (0.604)   |          |     |
| Observations                          | 661 | 661       | 661      | 661 |

Robust standard errors in parentheses

\*\*\* p<0.01, \*\* p<0.05, \* p<0.1
